# Supplementary material for: Zeolitic-imidazolate-framework (ZIF-8)/PEDOT:PSS composite counter electrode for low cost and efficient dye-sensitized solar cells
Source: Royal Society of Chemistry journal article supplement (doi:10.1039/c8nj03192d), 2018-01-01
Supplement: c8nj03192d1.pdf [file c8nj03192d1.pdf]

## Supporting information

### **Zeolitic-Imidazolate-Framework (ZIF-8)/PEDOT: PSS Composite Counter Electrode for Low Cost and Efficient Dye-Sensitized Solar Cells**

*Abdelaal. S. A. Ahmed<sup>1</sup>, Wanchun Xiang<sup>1\*</sup>, Ibrahim Saana Amiin<sup>2</sup>, Xiujian Zhao<sup>1\*</sup>*

<sup>1</sup> State Key Laboratory of Silicate Materials for Architecture, Wuhan University of Technology, Luoshi Road, Wuhan 430070, P. R. China

<sup>2</sup> State Key Laboratory of Advanced Materials Synthesis and Processing, Wuhan University of Technology, Luoshi Road, Wuhan 430070, P. R. China

#### **\*Corresponding authors:**

Email: [xiangwanchun@whut.edu.cn](mailto:xiangwanchun@whut.edu.cn) (W. Xiang), [opluse@whut.edu.cn](mailto:opluse@whut.edu.cn) (X. Zhao)

## 1 Materials and reagents

All used reagents and solvents were obtained from commercial sources. Both of PEDOT:PSS (1.3 wt % dispersed in H<sub>2</sub>O), lithium iodide (LiI, 99%), Iodine (I<sub>2</sub>, 99.8%), 4-*tert*-butylpyridine (4-tBP, C<sub>9</sub>H<sub>13</sub>N, 96%), titanium di-isopropoxide bis (acetylacetonate) (TAA) [(CH<sub>3</sub>)<sub>2</sub>CHO]<sub>2</sub>Ti (C<sub>5</sub>H<sub>7</sub>O<sub>2</sub>)<sub>2</sub>, 75 wt. % in isopropanol], bis (*tri*-Fluor methane) sulfonamide lithium salt (LiTFSI), hex chloroplatinic acid hexahydrate (H<sub>2</sub>PtCl<sub>6</sub>·6H<sub>2</sub>O, 37.50% Pt basis), 2-methylimidazole (98.0%) and MK2 dye were purchased from Sigma-Aldrich, while Anhydrous acetonitrile (CH<sub>3</sub>CN, 99.80%) , *tert*-butyl alcohol were from Alfa Aesar and Ru dye, cis-di (thiocyanato) bis (2, 2-bipyridyl-4, 4-dicarboxylate) ruthenium (II) (N719) from Dyesol. Titanium dioxide paste (average particle size: 18, 30 nm and 400 nm) and FTO conductive glass (2 mm thickness, square resistance 10–15 Ω sq<sup>-1</sup>) from OPV Tech Co. Zn (NO<sub>3</sub>)<sub>2</sub>·6H<sub>2</sub>O (~99.99%), were obtained and ethylene glycol (EG) from Sinopharm Chemical Reagent Beijing Co., Ltd. All used reagents were of analytical purity and used as received. De-ionized (DI) water was obtained from an ultra-pure purifier (Ulu pure, China, resistivity ≥ 18.2 MΩ).

## 2 Fabrication of Mesoporous TiO<sub>2</sub> photoanode

The iodine electrolyte-based DSSCs were prepared as follows; TiO<sub>2</sub> photoanodes was prepared by using fluorine-doped SnO<sub>2</sub> (FTO) conducting glass substrates, FTO washed with a detergent solution, rinsed with deionized (DI) water and finally ethanol in an ultrasonic bath for 30 min. A thin blocking layer of TiO<sub>2</sub> was prepared on a clean FTO glass via spray pyrolysis of a 10% (v/v) solution of titanium isopropoxide bis-acetylacetonate in ethanol at 450°C. A commercial TiO<sub>2</sub> Paste (18 nm-sized) was printed onto the treated FTO-titanium isopropoxide to form the transparent layer (4×4 mm). The printing process was repeated for five times followed by

annealing at 120 °C for 10 min. A scattering layer was printed on top of the transparent layer. The screen-printed TiO<sub>2</sub> films with 0.16 cm<sup>2</sup> active area were sintered at 500 °C for 30 min in programmable system followed by treated in 20 mM TiCl<sub>4</sub> (aq) bath at 70 °C for 30 min, after cooled to room temperature, the nanocrystalline TiO<sub>2</sub> electrode the electrode was washed with distilled water and ethanol and fired again at 500°C in air for 30 min. Once cooled, the electrodes were bathed into a 0.3 mM solution of N-719 dye in absolute ethanol for 18 h in dark at room temperature.

In case of cobalt electrolyte-based DSSCs, TiO<sub>2</sub> photoanode was fabricated also by the same technique in iodine DSSCs except for TiO<sub>2</sub> paste (20 nm) was used in transparent layer with little thickness, the obtained TiO<sub>2</sub> films were immersed on 0.3 mM MK-2 dye solution (1:1 acetonitrile and tert-butanol) and keep in dark at room temperature for about 5 h.

The symmetrical dummy cells for both iodine and cobalt electrolyte based DSSCs were prepared by two identical CEs, and the redox electrolytes are similar to that used in assembling complete DSSCs.

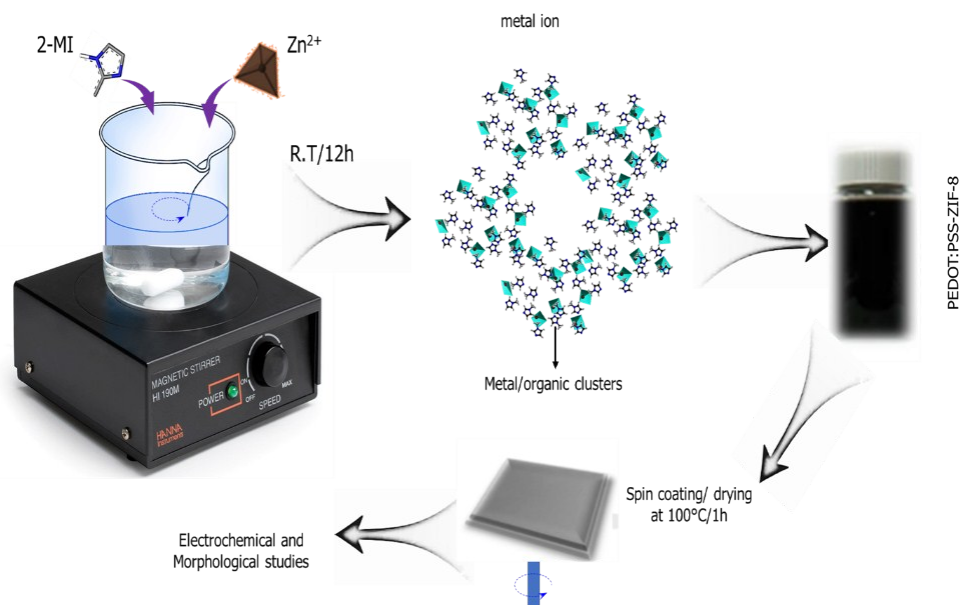

Scheme S1: Schematics for the prepare of ZIF-8/PEDOT: PSS CEs.

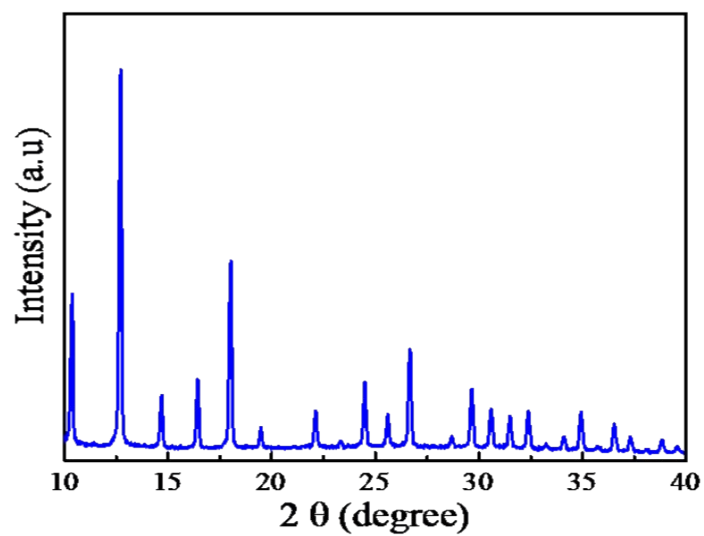

Fig. S1: XRD of the as prepared ZIF-8

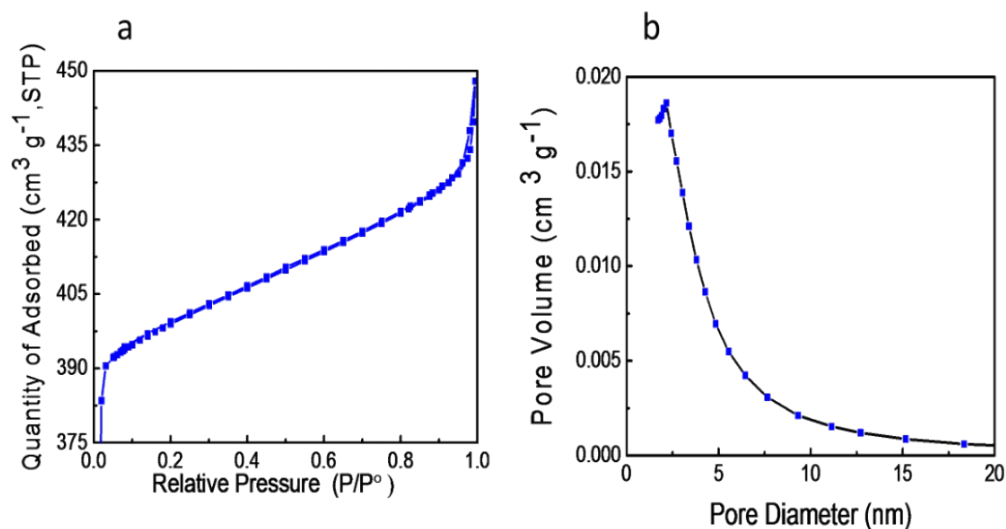

Fig. S2: (a) Nitrogen adsorption-desorption isotherms for ZIF-8 and (b) pore volume distribution.

Table S1. BET obtained parameters for ZIF-8.

| BET surface area | BJH Desorption cumulative volume of pores | BJH Desorption average pore diameter (4V/A) |
|------------------|-------------------------------------------|---------------------------------------------|
| 1592.27 m². g⁻¹  | 0.11 cm³.g⁻¹                              | 56.95 Å                                     |

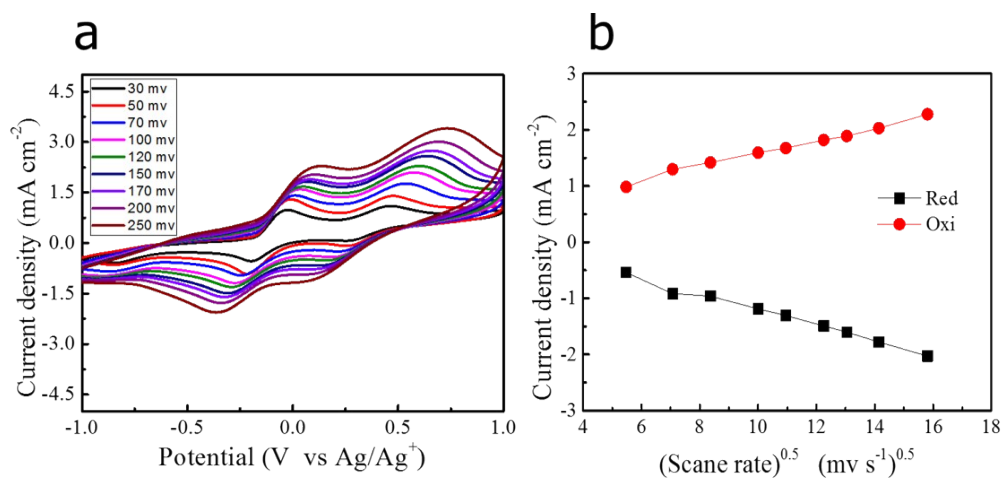

Fig. S3: (a) CV curves of (3%)ZIF-8/PEDOT: PSS CE at different scan rate and (b) the relationship between peak current density and the square root of scan rates of (3%) ZIF-8/PEDOT: PSS CE.

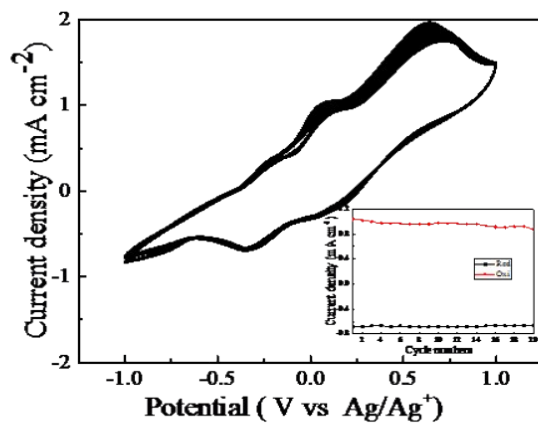

Fig.S4: 20 times consecutive CVs of the (3%) ZIF-8/ PEDOT: PSS complex CE with a scan rate of 50 mVs<sup>-1</sup> in iodine-based electrolyte.

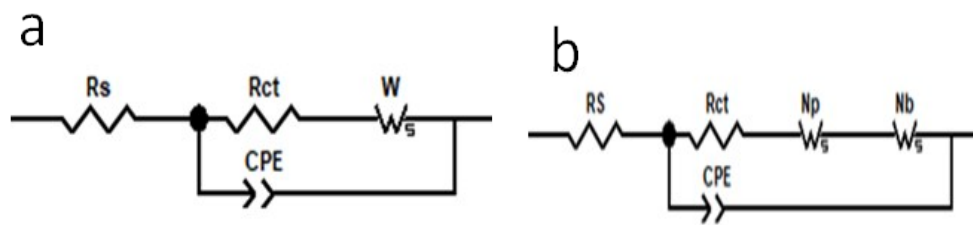

Fig. S5: (a) Equivalent circuit of Pt symmetric cell and (b) equivalent circuit of as prepared ZIF-8/ PEDOT: PSS based symmetric cells.

Table S2. Electrochemical parameters of symmetric dummy cells with iodine-based electrolyte

| CEs                  | $J_{pc}$<br>(mA m <sup>-2</sup> ) | $E_{pp}$<br>(mV) | $J_{ox}/ J_{red} $ | Log $J_o$<br>(mAcm <sup>-2</sup> ) | $R_{ct}$<br>Tafel | $\tau$<br>( $\mu$ s) | $D_n$<br>cm <sup>-2</sup> s <sup>-1</sup> |
|----------------------|-----------------------------------|------------------|--------------------|------------------------------------|-------------------|----------------------|-------------------------------------------|
| Pristine PEDOT: PSS  | -0.55                             | 611              | 1.55               | 0.53                               | 3.71              | 37.92                | $3.69 \times 10^{-6}$                     |
| 1% ZIF-8/ PEDOT: PSS | -0.67                             | 504              | 1.54               | 0.71                               | 2.45              | 35.64                | $8.23 \times 10^{-6}$                     |
| 3% ZIF-8/ PEDOT: PSS | -0.92                             | 203              | 1.41               | 1.04                               | 0.68              | 28.31                | $8.45 \times 10^{-6}$                     |
| 5% ZIF-8/ PEDOT: PSS | -0.68                             | 335              | 1.62               | 0.66                               | 2.72              | 28.31                | $8.02 \times 10^{-6}$                     |
| Pt                   | -0.96                             | 258              | 1.61               | 1.19                               | 0.81              | 14.19                | $6.27 \times 10^{-6}$                     |

with different CEs

Table S3. Photovoltaic performances of DSSCs with  $I^-/I_3^-$  redox couple electrolyte different CEs under AM1.5G illumination

| CEs                   | DSSCs<br>(number) | Voc<br>mV    | Jsc<br>(mA/cm <sup>2</sup> ) | FF<br>(%)    | Eff<br>(%)  |
|-----------------------|-------------------|--------------|------------------------------|--------------|-------------|
| Pt                    | Cell (1)          | 712          | 14.36                        | 71.12        | 7.27        |
|                       | Cell (2)          | 712          | 13.58                        | 74.30        | 7.20        |
|                       | Cell (3)          | 713          | 13.70                        | 74.16        | 7.24        |
|                       | <b>Average</b>    | <b>712.3</b> | <b>13.88</b>                 | <b>73.19</b> | <b>7.24</b> |
|                       | SD (±)            | 0.00         | 0.42                         | 01.79        | 0.03        |
| PEDOT: PSS            | Cell (1)          | 706          | 12.18                        | 44.17        | 3.79        |
|                       | Cell (2)          | 702          | 12.06                        | 47.79        | 4.05        |
|                       | Cell (3)          | 703          | 12.05                        | 49.27        | 4.18        |
|                       | <b>Average</b>    | <b>704</b>   | <b>12.10</b>                 | <b>47.08</b> | <b>4.00</b> |
|                       | SD (±)            | 0.002        | 0.07                         | 2.622        | 0.19        |
| (1%) ZIF-8/PEDOT: PSS | Cell (1)          | 756          | 12.17                        | 50.72        | 4.67        |
|                       | Cell (2)          | 753          | 12.14                        | 51.84        | 4.74        |
|                       | Cell (3)          | 751          | 12.13                        | 52.88        | 4.82        |
|                       | <b>Average</b>    | <b>753</b>   | <b>12.15</b>                 | <b>51.81</b> | <b>4.74</b> |
|                       | SD (±)            | 0.002        | 0.025                        | 1.082        | 0.076       |
| (3%) ZIF-8/PEDOT: PSS | Cell (1)          | 780          | 13.78                        | 60.02        | 6.46        |
|                       | Cell (2)          | 782          | 13.80                        | 60.30        | 6.51        |
|                       | Cell (3)          | 782          | 13.63                        | 60.92        | 6.49        |
|                       | <b>Average</b>    | <b>781</b>   | <b>13.74</b>                 | <b>60.40</b> | <b>6.49</b> |
|                       | SD (±)            | 0.000        | 0.094                        | 0.462        | 0.025       |
| (5%) ZIF-8/PEDOT: PSS | Cell (1)          | 734          | 13.30                        | 57.20        | 5.61        |
|                       | Cell (2)          | 733          | 13.14                        | 59.63        | 5.74        |
|                       | Cell (3)          | 730          | 13.15                        | 60.33        | 5.79        |
|                       | <b>Average</b>    | <b>732</b>   | <b>13.19</b>                 | <b>59.05</b> | <b>5.71</b> |
|                       | SD (±)            | 0.004        | 0.083                        | 1.643        | 0.09        |

SD: standard deviation



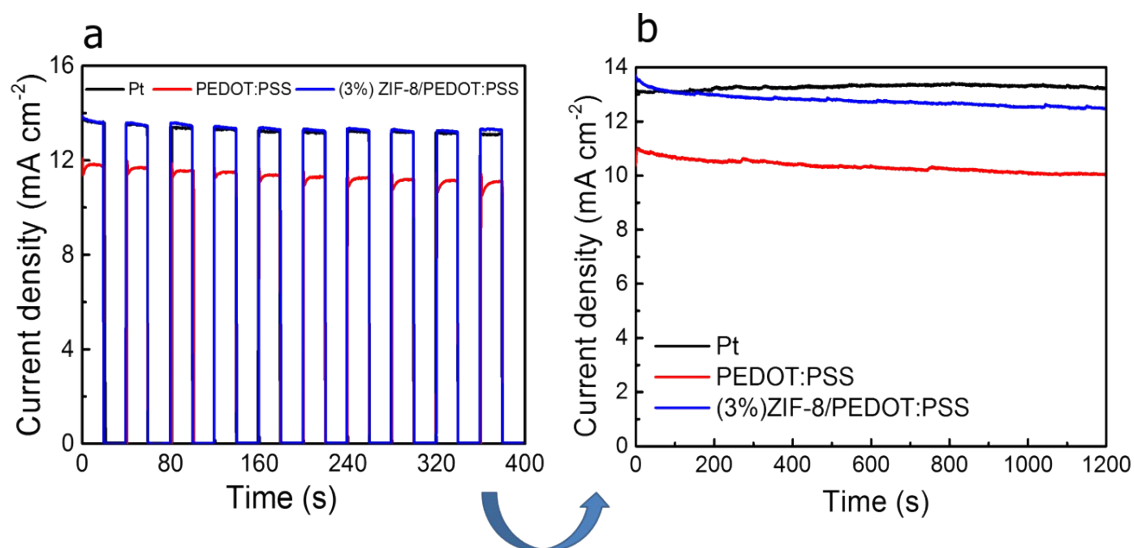

Fig. S6. Start-stop switches (a) of the DSSCs by alternately irradiating ( $100 \text{ mW.cm}^{-2}$ ) and darkening ( $0 \text{ mW.cm}^{-2}$ ) at an interval of 20 s and at 0 V, (b) the photocurrent stabilities of the DSSCs under continuous irradiation of  $100 \text{ mW.cm}^{-2}$ .

## Cobalt electrolyte supplementary data

Table S4. Photovoltaic performances of DSSCs  $Co^{3+}/Co^{2+}$  electrolyte with different CEs under AM1.5G illumination.

| CEs                   | DSSCs          | Voc<br>mV  | Jsc<br>(mA/cm <sup>2</sup> ) | FF<br>(%)    | Eff<br>(%)  |
|-----------------------|----------------|------------|------------------------------|--------------|-------------|
| Pt                    | Cell (1)       | 823        | 13.09                        | 72.03        | 7.76        |
|                       | Cell (2)       | 818        | 12.8                         | 69.9         | 7.32        |
|                       | Cell (3)       | 806        | 12.86                        | 73.3         | 7.60        |
|                       | <b>Average</b> | <b>816</b> | <b>12.92</b>                 | <b>71.74</b> | <b>7.56</b> |
|                       | SD ( $\pm$ )   | 0.008      | 0.16                         | 1.72         | 0.22        |
| PEDOT: PSS            | Cell (1)       | 855        | 10.14                        | 65.57        | 5.69        |
|                       | Cell (2)       | 853        | 10.30                        | 65.80        | 5.78        |
|                       | Cell (3)       | 850        | 10.43                        | 65.73        | 5.83        |
|                       | <b>Average</b> | <b>853</b> | <b>10.30</b>                 | <b>65.70</b> | <b>5.77</b> |
|                       | SD ( $\pm$ )   | 0.002      | 0.15                         | 0.17         | 0.07        |
| (1%) ZIF-8/PEDOT: PSS | Cell (1)       | 852        | 11.36                        | 70.03        | 6.78        |
|                       | Cell (2)       | 853        | 11.66                        | 69.57        | 6.92        |
|                       | Cell (3)       | 853        | 11.36                        | 70.41        | 6.81        |
|                       | <b>Average</b> | <b>852</b> | <b>11.46</b>                 | <b>70.00</b> | <b>6.84</b> |
|                       | SD ( $\pm$ )   | 0.000      | 0.17                         | 0.42         | 0.07        |
| (3%) ZIF-8/PEDOT: PSS | Cell (1)       | 859        | 9.54                         | 66.78        | 5.48        |
|                       | Cell (2)       | 856        | 8.49                         | 64.86        | 4.72        |
|                       | Cell (3)       | 858        | 8.53                         | 65.48        | 4.79        |
|                       | <b>Average</b> | <b>858</b> | <b>8.85</b>                  | <b>65.71</b> | <b>5.00</b> |
|                       | SD ( $\pm$ )   | 0.000      | 0.59                         | 0.98         | 0.42        |
| (5%) ZIF-8/PEDOT: PSS | Cell (1)       | 855        | 8.43                         | 68.75        | 4.95        |
|                       | Cell (2)       | 856        | 8.56                         | 69.18        | 5.07        |
|                       | Cell (3)       | 856        | 8.56                         | 69.18        | 5.07        |
|                       | <b>Average</b> | <b>856</b> | <b>8.52</b>                  | <b>69.04</b> | <b>5.03</b> |
|                       | SD ( $\pm$ )   | 0.000      | 0.08                         | 0.25         | 0.07        |

Table S5. Electrochemical parameters of symmetric dummy cells with cobalt based electrolyte with different CEs

| CEs                   | $J_{PC}$<br>(mA m <sup>-2</sup> ) | $E_{pp}$<br>(mV) | $J_{ox}/ J_{Red} $ | Log $J_o$<br>(mAcm <sup>-2</sup> ) | $R_s$<br>( $\Omega$ ) | $R_{ct}$<br>( $\Omega$ ) | $\tau$<br>( $\mu$ s) |
|-----------------------|-----------------------------------|------------------|--------------------|------------------------------------|-----------------------|--------------------------|----------------------|
| Pt                    | -0.26                             | 175              | 1.29               | 0.35                               | 8.52                  | 4.72                     | 31.78                |
| PEDOT: PSS            | -0.22                             | 238              | 1.75               | 0.69                               | 12.99                 | 28.18                    | 23.55                |
| (1%) ZIF-8/PEDOT: PSS | -0.47                             | 176              | 1.27               | 1.04                               | 12.01                 | 11.55                    | 2.70                 |
| (3%) ZIF-8/PEDOT: PSS | -0.43                             | 189              | 1.20               | 0.66                               | 13.69                 | 12.34                    | 3.03                 |
| (5%) ZIF-8/PEDOT: PSS | -0.38                             | 250              | 1.28               | 1.19                               | 14.57                 | 21.96                    | 3.65                 |

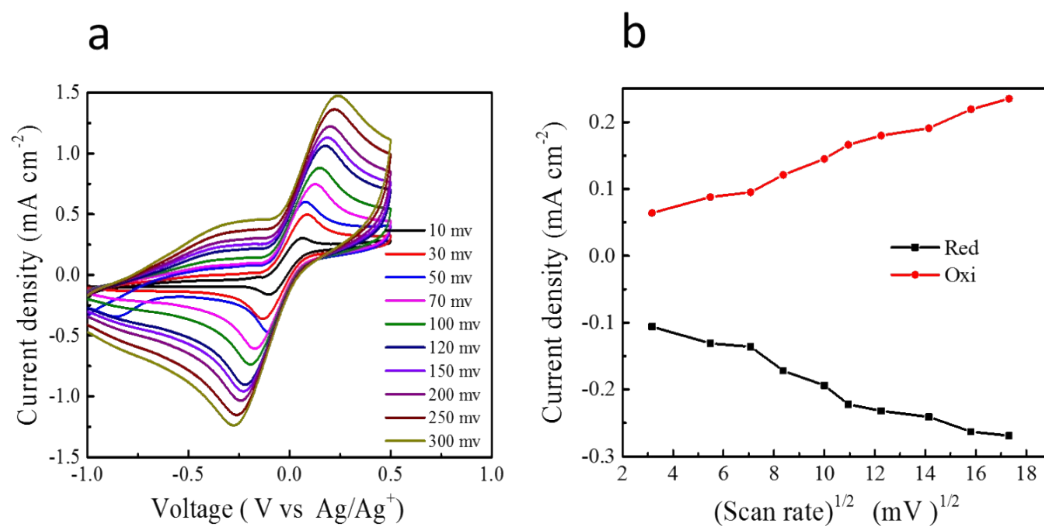

Fig. S7: 20 times consecutive CVs of the (1%) ZIF-8/ PEDOT: PSS complex CE with a scan rate of 50 mVs<sup>-1</sup> in cobalt-based electrolyte.

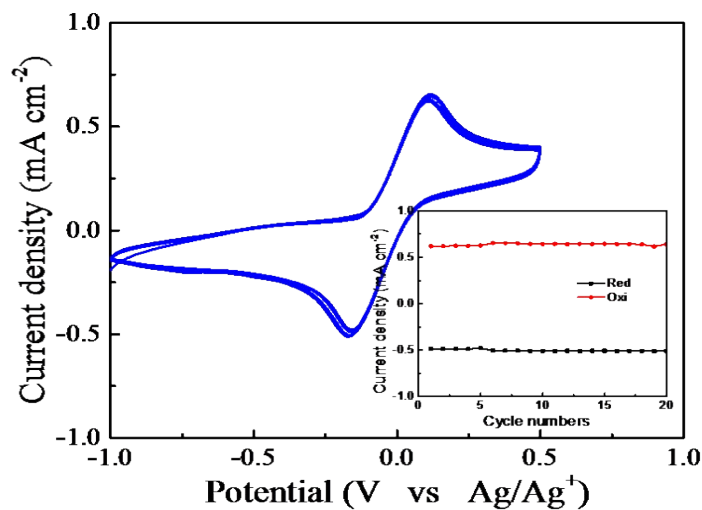

Fig. S8 A 20 consecutive CVs of the (1%) ZIF-8/ PEDOT: PSS complex CE with a scan rate of  $50 \text{ mV s}^{-1}$  in cobalt-based electrolyte.

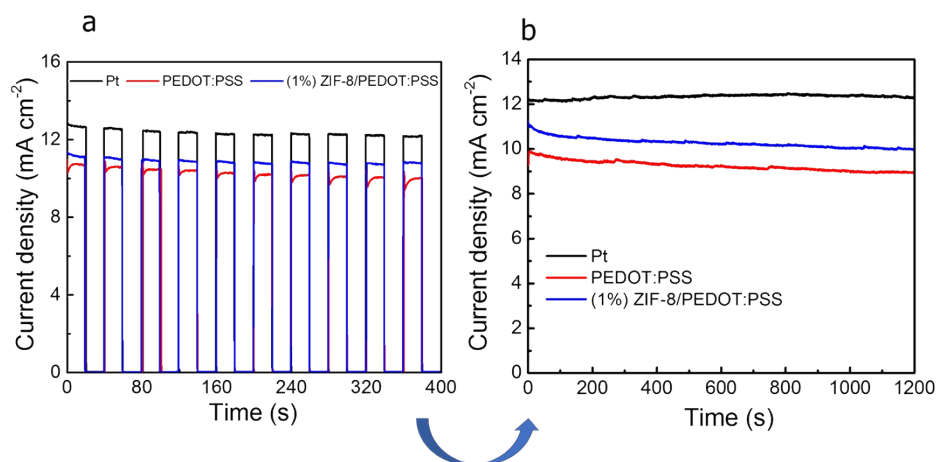

Fig. S9 Start-stop switches (a) of the DSSCs by alternately irradiating ( $100 \text{ mW.cm}^{-2}$ ) and darkening ( $0 \text{ mW.cm}^{-2}$ ) at an interval of 20 s and at 0 V, (b) the photocurrent stabilities of the DSSCs under continuous irradiation of  $100 \text{ mW.cm}^{-2}$ .
